# Supplementary material
Source: PubMed Central journal article supplement (PMC5910270)
Supplement: NIHMS937709-supplement-supplement_1.pdf [file NIHMS937709-supplement-supplement_1.pdf]

**Supplementary Table 1: Descriptive characteristics of the community controls in the study according to angina frequency score categories**

| <b>Variables</b>                                 | <b>No angina in past 4 weeks (N= 99)</b> | <b>Angina in past 4 weeks (N= 11)</b> | <b>Total population (N= 110)</b> |
|--------------------------------------------------|------------------------------------------|---------------------------------------|----------------------------------|
| <b>Demographic factors</b>                       |                                          |                                       |                                  |
| Age, Mean (SD)                                   | 50 (9)                                   | 48 (11)                               | 50 (9)                           |
| Women, N (%)                                     | 50 (50%)                                 | 7 (63%)                               | 57 (52%)                         |
| African-American, N (%)                          | 38 (38%)                                 | 8 (72%)                               | 46 (42%)                         |
| Below poverty line, N (%)                        | 7 (7%)                                   | 2 (18%)                               | 9 (9%)                           |
| Current smokers, N (%)                           | 3 (3%)                                   | 2 (18%)                               | 5 (5%)                           |
| <b>Psychological factors</b>                     |                                          |                                       |                                  |
| BDI-II score, Mean (SD) <sup>a</sup>             | 5 (5)                                    | 17 (14)                               | 6 (7)                            |
| STAI Anxiety-Trait score, Mean (SD) <sup>a</sup> | 31 (8)                                   | 40 (15)                               | 32 (10)                          |
| STAXI Anger-Trait score, Mean (SD)               | 14 (3)                                   | 15 (4)                                | 14 (3)                           |
| PCL score, Mean (SD) <sup>a</sup>                | 23 (8)                                   | 39 (20)                               | 24 (11)                          |
| Perceived-stress score, Mean (SD) <sup>a</sup>   | 10 (6)                                   | 17 (9)                                | 10 (6)                           |

SD: standard deviation; BDI: Beck Depression Inventory; STAI: State- Trait Anxiety Inventory; STAXI: State-Trait Anger Expression Inventory; PCL: PTSD Symptom Checklist (Civilian)

<sup>a</sup> P value < 0.05

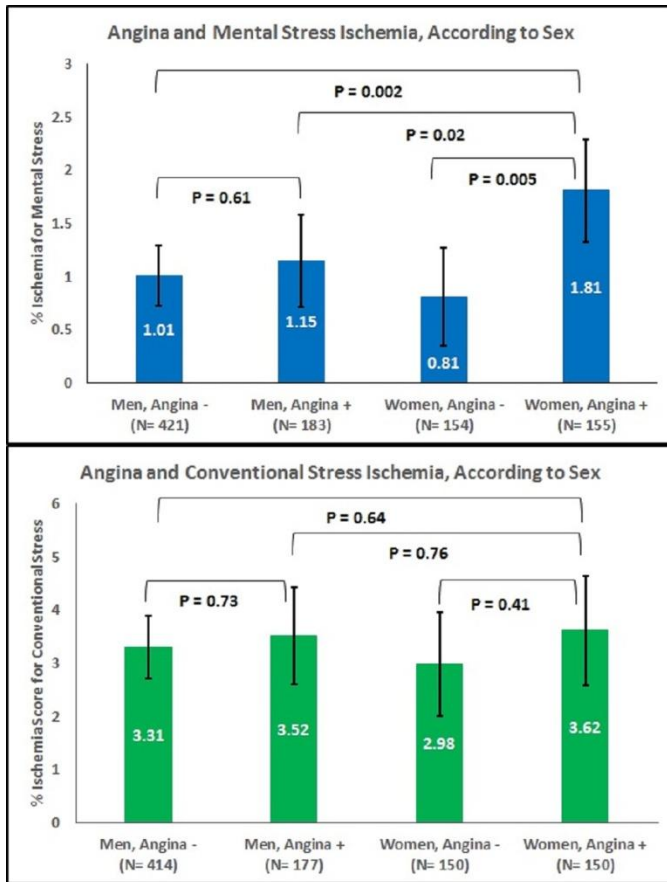

Angina and MSIMI\_AmJMed\_figure1\_103117.jpg
